# Supplementary material
Source: Frontiers journal article supplement (https://www.frontiersin.org/articles/284587)
Supplement: Presentation_1.pdf [file Presentation_1.pdf]

*Supplementary Material*

## **Diversity and Functional Analysis of the FeMo-cofactor Maturase NifB**

Simon Arragain<sup>1,2,§</sup>, Emilio Jiménez-Vicente<sup>1,3,§</sup>, Alessandro A. Scandurra<sup>1,4</sup>, Stefan Burén<sup>1</sup>, Luis M. Rubio<sup>1\*</sup>, and Carlos Echavarri-Erasun<sup>1\*</sup>

### **Author Affiliations**

<sup>1</sup>Centro de Biotecnología y Genómica de Plantas, Universidad Politécnica de Madrid (UPM) - Instituto Nacional de Investigación y Tecnología Agraria y Alimentaria (INIA), Campus Montegancedo UPM, 28223-Pozuelo de Alarcón, Madrid, Spain.

### **Author Information Notes**

\*Corresponding authors: carlos.echavarri@upm.es; lm.rubio@upm.es

§These authors contributed equally

<sup>2</sup>Current address: Department of Chemistry, University of California, Davis, CA 95616, USA

<sup>3</sup>Current address: Department of Biochemistry, Virginia Tech, Blacksburg, VA 24061, USA

<sup>4</sup>Current address: Merck, Cambridge Science Park, Cambridgeshire, CB4 0WE, UK

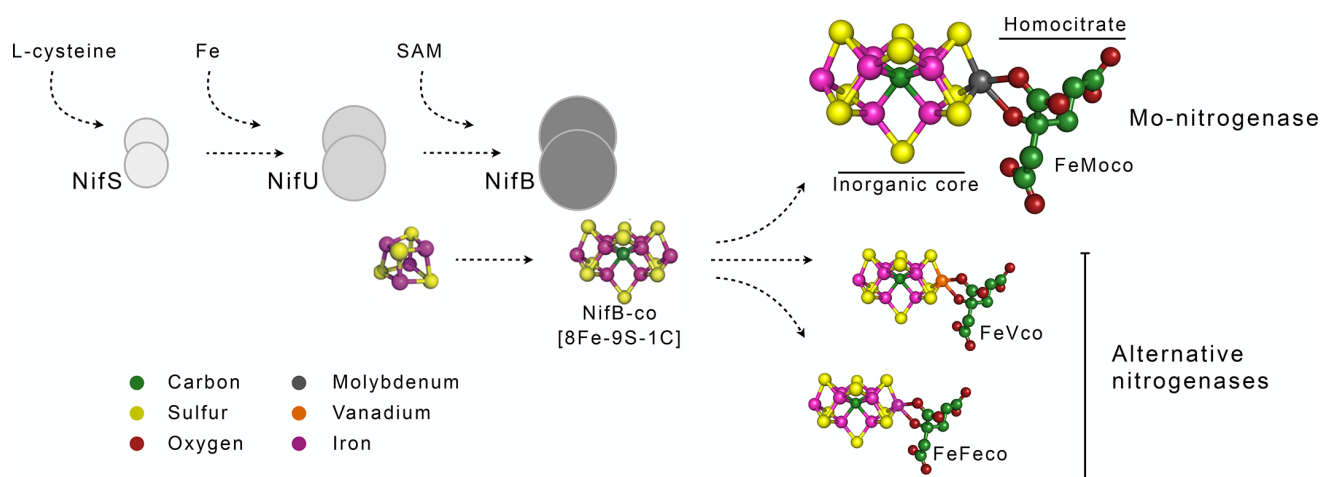

**Supplementary Figure 1.** Role of NifB in nitrogenase cofactor biosynthesis. NifB uses two [4Fe-4S] cluster units and SAM as substrates to synthesize a diamagnetic [8Fe-9S-C] cluster that serves as biosynthetic precursor to the active-site cofactors of all known nitrogenases. FeMo-co: iron-molybdenum cofactor; FeV-co: iron-vanadium cofactor; FeFe-co: iron-only cofactor.

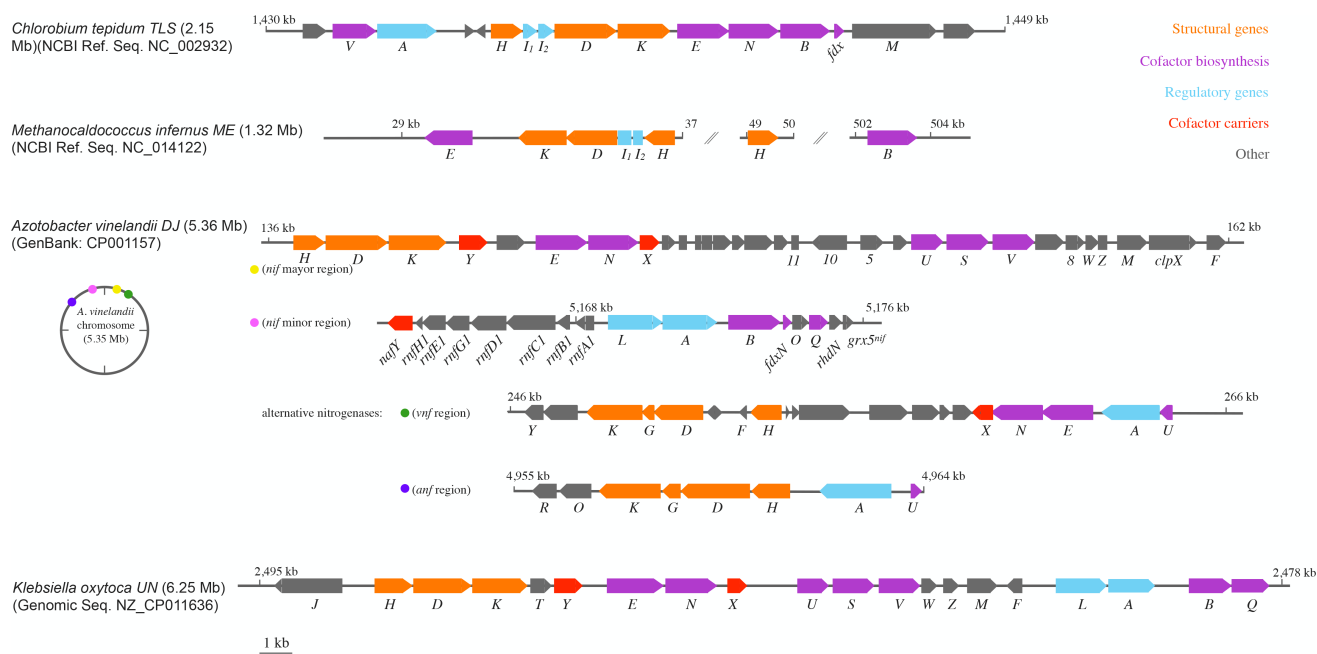

**Supplementary Figure 2.** Schematics of *nif* gene clusters in *C. tepidum*, *M. infernus*, *A. vinelandii* and *K. oxytoca*. *C. tepidum* and *K. oxytoca* carry single 12-kb and 20-kb *nif* genes clusters, respectively. *M. infernus* carries a *nifHII<sub>2</sub>DKE* gene cluster and separate copies of *nifH* and *nifB*. *A. vinelandii* has multiple nitrogen fixation clusters including *nif* for the Mo-nitrogenase, and *vnf* and *anf* regions for the alternative nitrogenases.

Biological information regarding *M. infernus* and *C. tepidum* strains:

*M. infernus* was first described as a hyperthermophilic lithotrophic methanogen isolated from deep-sea hydrothermal vents located at 3000 m depth in the Mid-Atlantic ridge. *M. infernus* presents a single chromosome of about 1.33 Mb predicted to encode for 1485 proteins. Although genome analysis reveals a basic *nif* configuration that could – theoretically – assemble a functional nitrogenase no study has yet been conducted that demonstrates *M. infernus* growth under diazotrophic conditions. Biochemical complementation assays proved that NifB<sub>Mi</sub> expressed and purified from *E. coli* was able to support FeMo-co biosynthesis *in vitro* when complemented with other purified Nif proteins.

*C. tepidum* TLS is a green-sulfur bacterium within the Chlorobia phylum that possesses a single 2.154 Mb chromosome. This bacterium performs anoxygenic photosynthesis and N<sub>2</sub> fixation when conditions are adequate. It was originally isolated from hot springs rich in sulfide in New Zealand.

To date, *C. tepidum* is the only thermophilic species in the Chlorobium genus with an optimum growth temperature of 48°C. *C. tepidum nif* genes are concentrated in a single operon and most genes appear related to archaea homologs, suggesting that nitrogen fixation in *C. tepidum* may have occurred by lateral gene transfer.

|                        | <b><i>Methanocaldococcus infernus</i></b> | <b><i>Chlorobium tepidum</i></b> |
|------------------------|-------------------------------------------|----------------------------------|
| Domain                 | archaea                                   | bacteria                         |
|                        | methanogens                               | chlorobiae                       |
| NCBI TAXID             | 573063                                    | 194439                           |
| NCBI Genome            | NC_014122.1                               | NC_002932.3                      |
| Genome size (Mb)       | 1.33                                      | 2.19                             |
| Predicted proteins     | 1485                                      | 1515                             |
| References (main text) | Jeanthon et al., 1998                     | Eisen et al., 2002               |

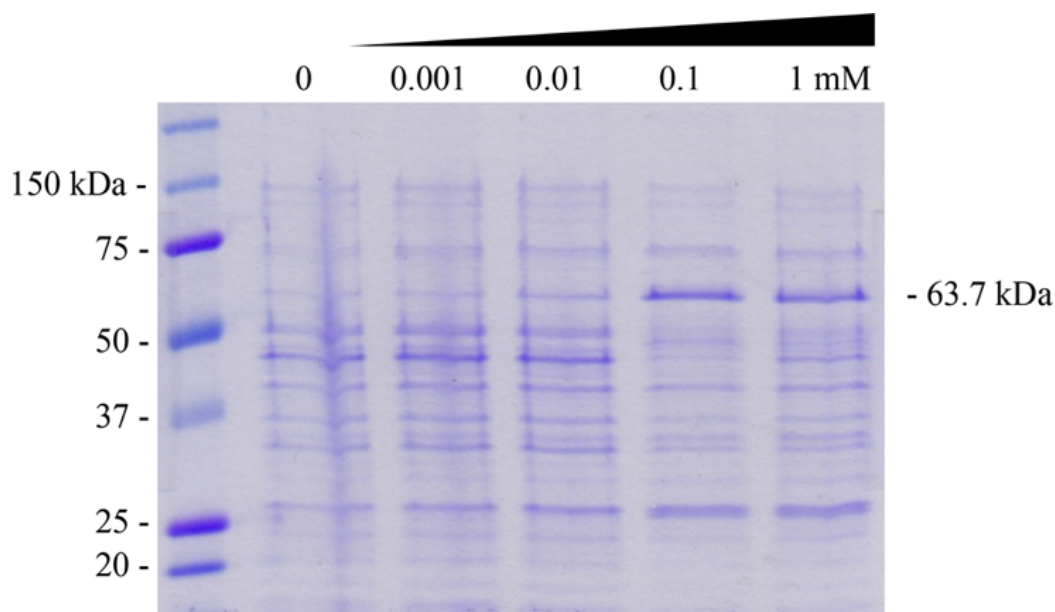

**Supplementary Figure 3.** Expression of NifB<sub>KO</sub>-ΔC in *K. oxytoca*. IPTG titration to test expression of GST-NifB<sub>KO</sub>-ΔC in *K. oxytoca*. Cells from IPTG induced cultures were collected and boiled in Laemmli buffer. Whole cell proteins were separated by SDS-PAGE and stained with Coomassie blue. Lane 1, molecular weight markers; lane 2, whole-cell protein profile in the absence of IPTG; lanes 3-6, whole-cell protein profiles 4 h after IPTG induction (1 μM to 1 mM IPTG). The 63.7 kDa protein corresponds to the size of GST-NifB<sub>KO</sub>-ΔC.
